# Supplementary material
Source: PubMed Central journal article supplement (PMC2757185)

**Supplemental Fig. 1.** Inhibition of shuttling by GFP-Foxa2 but not HAFLAG-Foxa2. (A) HepG2 cells were transfected with 20ng of pEGFP-C1 (Clontech) or GFPC1-Foxa2, with or without cotransfection of AKT2 (40ng), and detected by fluorescence microscopy. (B and C) Nuclear and cytoplasmic fractionation of HepG2 cells stably expressing GFPC1-Foxa2 (B) or HAFLAG-Foxa2 (C; 3B4, 3B6, 3B10 denote individual clones), with and without stimulation with 500nM insulin for 15min. LSD1, GAPDH and  $\gamma$ Tubulin were used as nuclear, cytoplasmic and loading control markers, respectively.

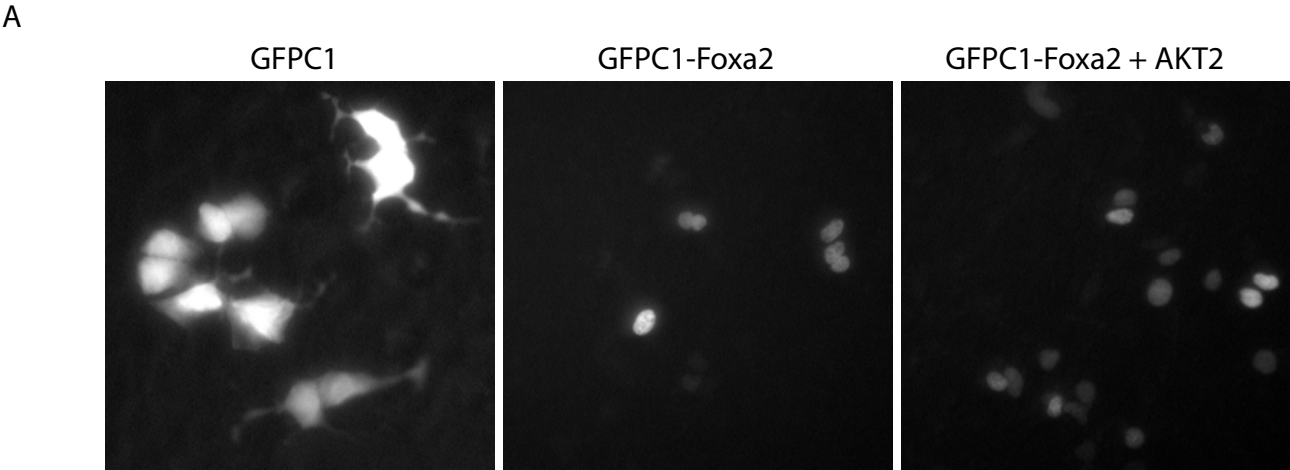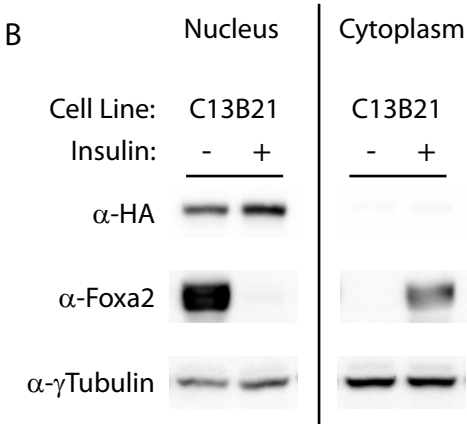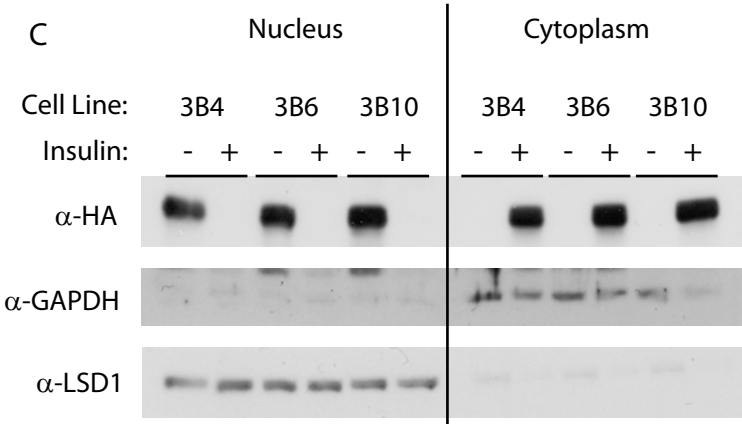

Supplement: supp_M109.042135_jbc.M109.042135-1.pdf [file supp_M109.042135_jbc.M109.042135-1.pdf]
